# Supplementary material for: Evaluation of a self-management patient education program for patients with chronic heart failure undergoing inpatient cardiac rehabilitation: study protocol of a cluster randomized controlled trial
Source: PubMed Central journal article supplement (PMC3765303; doi:10.1186/1471-2261-13-60), 2013-08-23
Supplement: 1471-2261-13-60-S1.pdf [file 1471-2261-13-60-S1.pdf]

**Additional file 1 - Description of the “Curriculum Heart Failure”**

| <b>Module<br/>(Trainer)</b>                                                                                  | <b>Time<br/>(min)</b> | <b>Content</b>                                                                                                                                                                                                                                                                  | <b>Methods</b>                                                                                                                                                      | <b>Materials</b>                                                                                                                                                                                                       |
|--------------------------------------------------------------------------------------------------------------|-----------------------|---------------------------------------------------------------------------------------------------------------------------------------------------------------------------------------------------------------------------------------------------------------------------------|---------------------------------------------------------------------------------------------------------------------------------------------------------------------|------------------------------------------------------------------------------------------------------------------------------------------------------------------------------------------------------------------------|
| Module 1: Heart failure –<br>what does it mean and<br>how can it be treated?<br>(Physician)                  | 60                    | Introduction to the program (content, targets, organization);<br>HF: aetiology, symptoms and signs, diagnostics, treatment<br>options, non-surgical device treatment, surgery,<br>pharmacological treatment                                                                     | Interactive short<br>lectures, group<br>discussion, homework                                                                                                        | ppt-presentation, flipchart, educational booklet<br>with HF information and worksheets (“the causes<br>of my illness”), symptom-monitoring diary with<br>worksheet (“my medication report”)                            |
| Module 2: Heart failure –<br>what can I do on my<br>own?<br>(Nurse, physician)                               | 75                    | Lifestyle and self-care recommendations for cardiac patients<br>and HF patients; symptom-monitoring; fluid balance;<br>management of fluid and sodium intake; signs and<br>management of fluid overload and deterioration; daily weight,<br>pulse and blood pressure monitoring | Interactive short<br>lectures, group<br>discussion, individual<br>work and homework                                                                                 | ppt-presentation, flipchart, educational booklet<br>with HF information and worksheets (“my<br>individual recommendations for a healthy life”,<br>“how much do I drink in everyday life”),<br>symptom-monitoring diary |
| Module 3: Heart failure –<br>how can physical activity<br>help?<br>(Physiotherapist,<br>exercise therapists) | 60                    | Physical activity recommendations for HF patients;<br>experience with physical activity; individual ideas for<br>physical activity after discharge; action and coping planning;<br>action control                                                                               | Interactive short<br>lectures, partner<br>work/group discussion,<br>homework.<br><br>Behavior change<br>techniques [21]: 1, 21,<br>18, 5, 7, 8, 10, 16 <sup>a</sup> | ppt-presentation, flipchart, educational booklet<br>with HF information and worksheets (“my<br>activity plan”, “my activity record”)                                                                                   |

|                                                                                            |    |                                                                                                                                                                                                                                                                                                |                                                                                                 |                                                                                                                                                                                                                     |
|--------------------------------------------------------------------------------------------|----|------------------------------------------------------------------------------------------------------------------------------------------------------------------------------------------------------------------------------------------------------------------------------------------------|-------------------------------------------------------------------------------------------------|---------------------------------------------------------------------------------------------------------------------------------------------------------------------------------------------------------------------|
| Module 4: Heart failure –<br>what changes in<br>everyday life may arise?<br>(Psychologist) | 60 | Illness burden and coping in everyday life; recognizing emotional distress, depression and anxiety; coping and seeking (professional) help; coping with sexual difficulties                                                                                                                    | Interactive short lectures, group discussion, individual work, relaxation exercise (optionally) | ppt-presentation, flipchart, educational booklet with HF information and worksheet (“peer stories”)                                                                                                                 |
| Module 5: Heart failure –<br>how can medicine help?<br>(Physician)                         | 60 | HF medicines (main types, common side effects); medication adherence - unintentional and intentional barriers for taking medicine and corresponding management strategies; daily weight, pulse and blood pressure monitoring at home; physical activity plans; individual “take-home-messages” | Interactive short lectures, group discussion, individual work                                   | ppt-presentation, flipchart, educational booklet with HF information and worksheets (“tips for taking medicine as prescribed”, “my activity plan”), symptom-monitoring diary and worksheet (“my medication record”) |

The detailed trainer manual is available in German and can be requested from the authors.

<sup>a</sup> 1 indicates “provide information on consequences of behavior in general”; 5, “goal setting (behavior)”; 7, “action planning”; 8, “barrier identification/problem solving”; 10, “prompt review of behavioral goals”; 16, “prompt self-monitoring of behavior”; 18, “prompt focus on past success”; 21, “provide instruction on how to perform the behavior”.
